# Supplementary material
Source: MDPI journal article supplement (https://www.mdpi.com/2311-7524/7/6/130)
Supplement: s1 [file s1]

# Role of glutathione-ascorbate cycle and photosynthetic electronic transfer in AOX manipulated waterlogging tolerance in watermelon seedlings

Jiawen Zheng<sup>1†</sup>, Chunying Fang<sup>1†</sup>, Lei Ru<sup>1</sup>, Nan Sun<sup>1</sup>, Yuanyuan Liu<sup>1</sup>, Yunping Huang<sup>2</sup>, Yuhong Wang<sup>2</sup>, Zhujun Zhu<sup>1\*</sup>, Yong He<sup>1\*</sup>

<sup>1</sup> School of Horticultural Science, Zhejiang A&F University, Hangzhou 311300, P.R. China, zhujun.zhu@zafu.edu.cn

<sup>2</sup> Ningbo Academy of Agricultural Sciences, Ningbo 315040, P. R. China

\* Correspondence: [heyong@zafu.edu.cn](mailto:heyong@zafu.edu.cn) (Y. He), [zhuzj@zafu.edu.cn](mailto:zhuzj@zafu.edu.cn) (Z. Zhu)

# J-W. Z and C-Y. F contributed equally.

Tab.1 Primer sequences used in the qRT-PCR experiments

| Gene         | Gene ID         | Forward Primer (5'–3') | Reverse Primer (5'–3')  |
|--------------|-----------------|------------------------|-------------------------|
| <i>AOX</i>   | Cla97C10G192430 | TGGCGGCGGTATGAAGGTCA   | GCTCAACAACCTCCTCCACTGG  |
| <i>APX</i>   | Cla97C02G030990 | GGCGTTATCCGTCGTAGACACA | TGTGCCAGCGTCATGCCAAG    |
| <i>CAT</i>   | Cla97C08G152180 | CCGATGCCGCCTAATGTGTTGA | CGAACCGCTCTTGCCTATCTGG  |
| <i>CSD</i>   | Cla97C03G050910 | TCCTTGCCCGACCTCCCTTAT  | GCCTCGTGAAGTTGCTCAAGAG  |
| <i>DHAR</i>  | Cla97C02G039140 | TGGTACTCGAAGTTGCGGTCAA | CCAACGGCACCTTCCCTTCT    |
| <i>GPOD</i>  | Cla97C03G055890 | TGCTGAACCCTGCCCATGTAGA | GGTGTACCACGGTCGTTCCCTCA |
| <i>GR</i>    | Cla97C09G170220 | TGCCACCGCTTCCCTCCTCT   | AACCGCCACTGAAGCACCAA    |
| <i>RbohA</i> | Cla97C01G002330 | AGACGATTGCCGCAGCTATTGT | GTTGGCTTGTCTGGTCCGAAGT  |
| <i>UBCP</i>  | Cla97C11G219340 | ACCAACAGTCCGCTTTGTGT   | ATTGGGCTCCACTGATTTTG    |

## Legends of Supplementary Figures

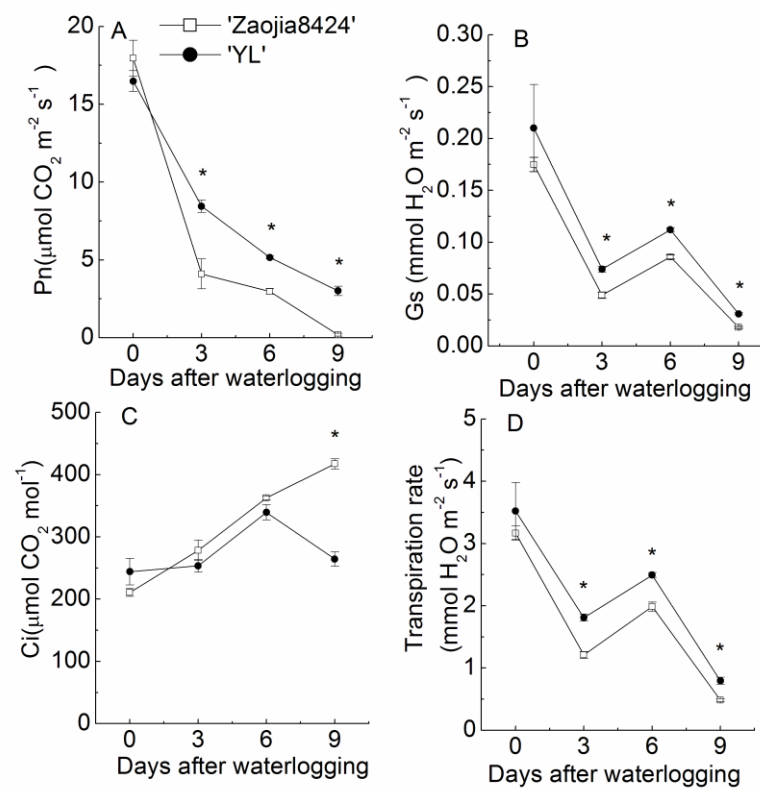

Fig.S1. Effects of waterlogging on photosynthesis two cultivars of watermelon ('Zaojia8424' and 'YL'). (A) Net photosynthesis rate (Pn). (B) Stomatal conductance (Gs). (C) Intercellular  $\text{CO}_2$  concentration (Ci). (D) Transpiration rate (E). \* indicates a significant

difference for 'YL' compared to 'Zaojia8424' at  $p < 0.05$  according to the least significant difference (LSD) test.

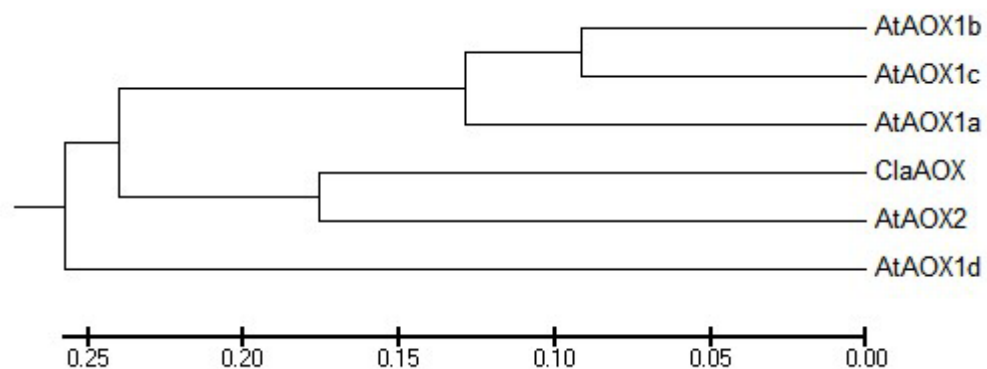

Fig.S2. Phylogenetic analysis of the alternative oxidase (AOX) amino acid sequences from watermelon genome. Trees were generated with MEGA 5.10 using the neighbour-joining methods following multiple sequence alignments with ClustalW. Abbreviation: At: *Arabidopsis thaliana*; (Accession number: *ClaAOX*, Cla97C10G192430).
